chemotherapy, increased tissue penetration and thermal enhancement of cytotoxicity are some of the advantages with HIPEC therapy

#### 44 Hipec Therapy-A New Development to Fight Cancer; Report Of 3 Cases

P. Prakash Narayan<sup>1</sup>, R. Dutta<sup>2</sup>

<sup>1</sup>East Surrey Hospital, Redhill, United Kingdom, <sup>2</sup>SSKM Hospital, Kolkata, India

**Introduction:** HIPEC is highly concentrated, heated chemotherapy treatment that is delivered directly to the abdomen during surgery. HIPEC delivers chemotherapy directly to cancer cells in abdomen. Cytoreductive surgery(CRS) combined with perioperative intraperitoneal chemotherapy is currently a valid treatment option for peritoneal dissemination of gastrointestinal, gynaecological cancers or primary peritoneal neoplasms.

**Method:** 3 patients with peritoneal surface malignancy were selected. PET scan was done for all the patients to assess metastasis and peritoneal carcinomatosis index(PCI) calculated was <20 for all 3 patients. They were then treated with CRS+HIPEC therapy with disease-specific chemotherapeutic agents like Cisplatin, Mitomycin and Doxorubicin and Oxaliplatin. Aim was

- 1) To assess the feasibility of cytoreductive surgery(CRS)+HIPEC in a tertiary care hospital
- 2) To assess the per-operative blood loss, operative time, immediate post-operative outcome and completeness of cytoreduction(CC) score.

**Results:** All the 3 patients had a good post-operative recovery with no recurrence in the follow-up period

**Conclusions:** HIPEC and CRS plays synergistic role. A complete CRS followed by HIPEC with the disease-specific chemotherapeutic agent at 41-43°C constitutes optimal treatment for certain malignancies. High regional concentration with low systemic concentration of
